# Supplementary material for: What We Do and Do Not Know about Teaching Medical Image Interpretation
Source: PubMed Central journal article supplement (PMC5334326; doi:10.3389/fpsyg.2017.00309), 2017-03-03
Supplement: Table_1.pdf [file Table_1.pdf]

## What we Do and Do Not Know about Teaching Medical Image Perception

Ellen M Kok\*, Koos van Geel, Jeroen J.G. van Merriënboer, Simon G. F. Robben

\* Correspondence: Ellen Kok: e.kok@maastrichtuniversity.nl

**Table 1. Overview of systematic search**

|   | reference                                                     | Topic                   | Findings                                                                                                                                                                          | Domain            |
|---|---------------------------------------------------------------|-------------------------|-----------------------------------------------------------------------------------------------------------------------------------------------------------------------------------|-------------------|
| 1 | (Ceresnak, Axelrod, Motonaga, Johnson, & Krawczeski, 2016)    | whole curriculum/course | Pediatric cardiology residents enrolled in a pediatric cardiology “boot camp” had significantly higher post-test than pre-test scores, and evaluated the course positively.       | ECG and radiology |
| 2 | (Cliff, Bedlow, Melia, Moss, & Harland, 2003)                 | whole curriculum/course | Medical students enrolled in a course involving a booklet on skin cancer plus a lecture had significantly higher post-test than pre-test scores.                                  | Dermatology       |
| 3 | (Darras et al., 2016)                                         | Whole curriculum/course | Residents enrolled in a new radiology curriculum had significantly higher test scores than residents enrolled in the old curriculum, and were more positive about the curriculum. | Radiology         |
| 4 | (Kohlwes & Shank, 2005)                                       | whole curriculum/course | Residents had significantly higher post-test scores than pre-test scores after an ECG course.                                                                                     | ECG               |
| 5 | (Lavranos, Koliaki, Briasoulis, Nikolaou, & Stefanadis, 2013) | whole curriculum/course | Medical students enrolled in a one-month ECG interpretation course had significantly higher post-test than pre-test scores.                                                       | ECG               |
| 6 | (B. F. Lee, Chiu, & Li, 2013)                                 | whole curriculum/course | Medical students enrolled in a case-based learning with traditional teaching curriculum evaluated the effectiveness of a nuclear medicine                                         | Radiology         |

|    |                                                       |                         |                                                                                                                                                                                                                                     |             |
|----|-------------------------------------------------------|-------------------------|-------------------------------------------------------------------------------------------------------------------------------------------------------------------------------------------------------------------------------------|-------------|
|    |                                                       |                         | curriculum more positively than students enrolled in a traditional teaching curriculum.                                                                                                                                             |             |
| 7  | (Liebman et al., 2012)                                | whole curriculum/course | Medical students enrolled in a dermoscopy tutorial improved significantly more in the diagnosis of cutaneous lesions compared to students who were not enrolled in the dermoscopy tutorial.                                         | Dermatology |
| 8  | (Mahler, Wolcott, Swoboda, Wang, & Arnold, 2011)      | whole curriculum/course | Medical students learned ECG interpretation through a workshop, a lecture or self-directed learning. All groups had significantly higher post-test than pre-test scores and scores were highest in the workshop and lecture groups. | ECG         |
| 9  | (Ochsendorf, Boehncke, Boer, & Kaufmann, 2004)        | whole curriculum/course | Students enrolled in a problem-oriented practical course and personal bedside teaching practical course had higher test-scores than students in a traditional course, and these courses were also more positively evaluated.        | Dermatology |
| 10 | (Ochsendorf, Boehncke, Sommerlad, & Kaufmann, 2006)   | whole curriculum/course | Students learned dermatology in a combination of large-group interactive teaching and small-group bedside teaching. This approach yielded higher scores and was more positively evaluated than a traditional course.                | Dermatology |
| 11 | (Raupach, Brown, Anders, Hasenfuss, & Harendza, 2013) | whole curriculum/course | Students learned ECG interpretation in a self-directed learning course, lectures or a small-group peer-teaching course. No significant differences between test scores were found.                                                  | ECG         |
| 12 | (Raupach et al., 2010)                                | whole curriculum/course | Students who learned ECG interpretation through near-peer teaching had a higher score than students in a lecture-based curriculum, but only when testing                                                                            | ECG         |

## Running Title

|    |                                                        |                         |                                                                                                                                                                                                                 |           |
|----|--------------------------------------------------------|-------------------------|-----------------------------------------------------------------------------------------------------------------------------------------------------------------------------------------------------------------|-----------|
|    |                                                        |                         | was formative, and not when it was summative.                                                                                                                                                                   |           |
| 13 | (Raupach, Harendza, Anders, Schuelper, & Brown, 2016)  | whole curriculum/course | Students were enrolled in an ECG interpretation course through self-directed learning, lectures or small-group peer teaching. No differences between groups were found.                                         | ECG       |
| 14 | (Rengier et al., 2013)                                 | whole curriculum/course | Medical students enrolled in a radiology course had significantly higher post-test than pre-test scores.                                                                                                        | Radiology |
| 15 | (Sendra-Portero, Torales-Chaparro, & Ruiz-Gomez, 2012) | Whole curriculum/course | Medical students had significantly higher post-test scores after a radiology course than pre-test scores                                                                                                        | Radiology |
| 16 | (Skinner, Freeman, & Sheehan, 2016)                    | whole curriculum/course | Residents improved their cardiac ultrasound acquisition and interpretation skills after a simulator-based curriculum.                                                                                           | Radiology |
| 17 | (Tigges, Lewis, McNulty, & Mullins, 2016)              | whole curriculum/course | Students enrolled in a vertically integrated radiology clerkship had tests scores comparable to those of students at other medical schools.                                                                     | Radiology |
| 18 | (Zeng et al., 2015)                                    | whole curriculum/course | Students enrolled in a “graphics-sequence memory method” course had significantly higher test scores than students enrolled in a traditional course.                                                            | ECG       |
| 19 | (Zhang & Hsu, 2013)                                    | whole curriculum/course | Nurses enrolled in a lecture-based ECG course had significantly higher post-test than pre-test scores but test scores were not significantly different from nurses enrolled in a self-learning handbook course. | ECG       |
| 20 | (Al-Rawi, Jacobs, Hassan,                              | e-learning              | Oral health specialists, but not dental students, had significantly                                                                                                                                             | Dental    |

|    |                                                     |            |                                                                                                                                                                                                       |             |
|----|-----------------------------------------------------|------------|-------------------------------------------------------------------------------------------------------------------------------------------------------------------------------------------------------|-------------|
|    | Sanderink, & Scarfe, 2007)                          |            | higher post-test than pre-test scores after interactive web-based education and all participant groups positively evaluated the course.                                                               | radiology   |
| 21 | (Bailey, Roth, Kohli, & Heitkamp, 2014)             | e-learning | Junior residents enrolled in an online training had significantly higher post-test than pre-test search pattern scores and also had significantly higher test scores than untrained residents.        | Radiology   |
| 22 | (Boespflug, Guerra, Dalle, & Thomas, 2015)          | e-learning | Dermatologists/dermatology residents enrolled in an e-learning course had significantly higher test scores than participants of the control group and the e-learning course was positively evaluated. | Dermatology |
| 23 | (Bojsen et al., 2015)                               | e-learning | Medical students enrolled in a web-based ECG interpretation training had significantly higher scores on an immediate post-test than the pre-test but not on retention tests.                          | ECG         |
| 24 | (Breen, Zhu, Bond, Finlay, & Clifford, 2016)        | e-learning | Students enrolled in an online e-learning training had non-significantly higher post-test than pre-test scores and positively evaluated the course.                                                   | ECG         |
| 25 | (Burbridge, Kalra, Malin, Trinder, & Pinelle, 2015) | e-learning | Medical students enrolled in an e-learning course had significantly higher test scores than students in the control group and they evaluated the course positively.                                   | Radiology   |
| 26 | (Chudakoff, Obuchowski, Mehta, & Reid, 2013)        | e-learning | Participants using a web-based pediatric radiology curriculum improved on average by 16.45% and evaluated the curriculum positively.                                                                  | Radiology   |
| 27 | (Chudgar, Engle, Grochowski, &                      | e-learning | Medical students enrolled in a self-directed e-learning ECG course had significantly higher post-test                                                                                                 | ECG         |

|    |                                                           |            |                                                                                                                                                                                                                                                                       |                  |
|----|-----------------------------------------------------------|------------|-----------------------------------------------------------------------------------------------------------------------------------------------------------------------------------------------------------------------------------------------------------------------|------------------|
|    | Gagliardi, 2016)                                          |            | than pre-test scores and also had significantly higher test-scores than a previous group, which did not have access to the course.                                                                                                                                    |                  |
| 28 | (DeBonis, Blair, Payne, Wigan, & Kim, 2015)               | e-learning | Psychiatry residents enrolled in an e-learning ECG-reading course had non-significant higher post-test than pre-test scores and evaluated the training positively.                                                                                                    | ECG              |
| 29 | (Fawcett, Widmaier, & Cavanaugh, 2004)                    | e-learning | Family medicine residents who actively participated in a digital dermatology instructional program scored significantly higher on post-tests than a pre-test than residents who did not actively participate, but over time the difference in test scores diminished. | Dermatology      |
| 30 | (Giunta, Di Stefani, & Chimenti, 2011)                    | e-learning | Medical students enrolled in an e-learning dermatology course had significantly higher test scores than students without access to this course.                                                                                                                       | Dermatology      |
| 31 | (Jenkins, Goel, & Morrell, 2008)                          | e-learning | Medical students enrolled in an e-learning dermatology course had non-inferior test scores compared to students who followed a lecture.                                                                                                                               | Dermatology      |
| 32 | (Kavadella, Tsiklakis, Vougiouklakis, & Lionarakis, 2012) | e-learning | Students enrolled in a blended learning course on dental radiology had significantly higher test scores than students enrolled in a traditional course and students evaluated the blended learning course positively.                                                 | Dental radiology |
| 33 | (Ketelsen et al., 2007)                                   | e-learning | Students enrolled in an e-learning course had non-inferior test scores compared to students who had a lecture course or printed text course; students preferred a mixture between lectures and e-learning.                                                            | Radiology        |

|    |                                                               |            |                                                                                                                                                                                                                                     |                  |
|----|---------------------------------------------------------------|------------|-------------------------------------------------------------------------------------------------------------------------------------------------------------------------------------------------------------------------------------|------------------|
| 34 | (Lieberman, Abramson, Volkan, & McArdle, 2002)                | e-learning | Students enrolled in an interactive e-learning course scored non-inferior to students enrolled in an interactive tutorial course.                                                                                                   | Radiology        |
| 35 | (Lim-Dunham, Ensminger, McNulty, Hoyt, & Chandrasekhar, 2016) | e-learning | The mean radiology score for students for whom an online radiology curriculum was mandatory was significantly higher than for students for whom the curriculum was voluntary.                                                       | Radiology        |
| 36 | (Mahnken, Baumann, Meister, Schmitt, & Fischer, 2011)         | e-learning | Medical students enrolled in an elective or mandatory e-learning course scored non-significantly higher on a post-test than students without access to the e-learning course.                                                       | Radiology        |
| 37 | (Maleck et al., 2001)                                         | e-learning | Students enrolled in a paper-based or e-learning course had significantly higher post-test than pre-test scores, in contrast to students without exposure to any course.                                                            | Radiology        |
| 38 | (Maloney, Hippe, Paladin, Chew, & Ha, 2016)                   | e-learning | Radiology residents enrolled in an e-learning course scored significantly higher on the post-test than pre-test but scores were not significantly different from scores of radiology residents who followed a lecture-based course. | Radiology        |
| 39 | (Meckfessel et al., 2011)                                     | e-learning | Students positively evaluated an e-learning course on dental radiology and failure rates on the final exam were lower than the failure rates of previous years, when the e-learning course was not yet implemented.                 | Dental radiology |
| 40 | (Mileman, van den Hout, & Sanderink, 2003)                    | e-learning | Students with access to a computer-assisted learning program before the test scored significantly higher than a group with no access to the                                                                                         | Dental radiology |

|    |                                                 |            |                                                                                                                                                                                                                      |             |
|----|-------------------------------------------------|------------|----------------------------------------------------------------------------------------------------------------------------------------------------------------------------------------------------------------------|-------------|
|    |                                                 |            | program before the test.                                                                                                                                                                                             |             |
| 41 | (Montassier et al., 2016)                       | e-learning | Medical students enrolled in an e-learning course on ECG reading scored significantly higher on the post-test than pre-test but scored not significantly different from students enrolled in a lecture-based course. | ECG         |
| 42 | (Nilsson et al., 2008)                          | e-learning | Medical students enrolled in an e-learning ECG course had significantly higher test scores than students who did not have access to the course.                                                                      | ECG         |
| 43 | (O'Connor et al., 2016)                         | e-learning | Medical students enrolled in an e-learning course had significantly higher post-test than pre-test scores, but scores were not significantly different from students enrolled in a traditional course.               | Radiology   |
| 44 | (Pagnanelli et al., 2003)                       | e-learning | Dermatologists enrolled in an e-learning course on dermatoscopy had significantly higher post-test than pre-test scores.                                                                                             | Dermatology |
| 45 | (Porras et al., 2016)                           | e-learning | Sports medicine fellows enrolled in an e-learning course on ECG interpretation had significantly higher post-test than pre-test scores.                                                                              | ECG         |
| 46 | (Porter, Bailey, Woods, Scott, & Johnson, 2015) | e-learning | Radiology residents enrolled in an e-learning course had significantly higher post-test than pre-test scores and felt more confident in their interpretation skills.                                                 | Radiology   |
| 47 | (Roesch et al., 2003)                           | e-learning | Medical students enrolled in an e-learning course scored higher on a test than students who were not enrolled and evaluated the e-                                                                                   | Dermatology |

|    |                                                                          |            |                                                                                                                                                                                                                                |             |
|----|--------------------------------------------------------------------------|------------|--------------------------------------------------------------------------------------------------------------------------------------------------------------------------------------------------------------------------------|-------------|
|    |                                                                          |            | learning course positively.                                                                                                                                                                                                    |             |
| 48 | (Salajegheh, Jahangiri, Dolan-Evans, & Pakneshan, 2016)                  | e-learning | Medical students enrolled in an e-learning course had significantly higher post-test scores than students who were not enrolled, but no significant retention of knowledge after one year was found.                           | Radiology   |
| 49 | (Sendra-Portero, Torales-Chaparro, Ruiz-Gomez, & Martinez-Morillo, 2013) | e-learning | Medical students enrolled in an e-learning course had significantly higher test scores than students enrolled in a traditional course and students evaluated the e-learning course positively.                                 | Radiology   |
| 50 | (Silva, Souza, Silva, de Medeiros, & Criado, 2011)                       | e-learning | Students enrolled in an e-learning course had significantly higher post-test than pre-test scores which were also significantly higher than the post-test scores of students who did not have access to the e-learning course. | Dermatology |
| 51 | (Singh, Boudville, Corderoy, Ralston, & Tait, 2011)                      | e-learning | Students enrolled in an e-learning course self-assessed their knowledge and skills to be higher than students of cohorts who did not have access to an e-learning course.                                                      | Dermatology |
| 52 | (Van Es, Kumar, Pryor, Salisbury, & Velan, 2015)                         | e-learning | Students enrolled in an e-learning course did not have significantly higher test scores than students enrolled in a traditional course, but the e-learning course was positively evaluated.                                    | Pathology   |
| 53 | (Van Es, Kumar, Pryor, Salisbury, & Velan, 2016)                         | e-learning | Medical students enrolled in an e-learning course did not have significantly higher test scores than students enrolled in a traditional course, but the e-learning course was positively evaluated.                            | Pathology   |



## Running Title

|     |                                                           |                                                        |                                                                                                                                                                                                                                            |                  |
|-----|-----------------------------------------------------------|--------------------------------------------------------|--------------------------------------------------------------------------------------------------------------------------------------------------------------------------------------------------------------------------------------------|------------------|
| 54  | (Webb & Choi, 2014)                                       | e-learning                                             | Students enrolled in an e-learning course had significantly higher post-test than pre-test scores and evaluated the e-learning course positively.                                                                                          | Radiology        |
| 55a | (Williams, Sato, & Policeni, 2013)                        | e-learning                                             | Radiology residents enrolled in a radiology e-learning course had significantly higher post-test than pre-test scores.                                                                                                                     | Radiology        |
| 55b | (Ark, Brooks, & Eva, 2006)                                | specific interventions (diagnostic reasoning)          | Students who learned ECG interpretation through a combined reasoning strategy (be feature-oriented and trust similarity) improved performance more than students who were instructed to be only feature-oriented or only trust similarity. | ECG              |
| 56  | (Auffermann, Henry, Little, Tigges, & Tridandapani, 2015) | specific interventions (diagnostic reasoning)          | Students enrolled in a nodule detection course at simulated work stations identified significantly more nodules on a test and positively evaluated the course.                                                                             | Radiology        |
| 57  | (Auffermann, Little, & Tridandapani, 2016)                | specific interventions (diagnostic reasoning)          | Students trained to use a search pattern to detect nodules in radiographs improved significantly more than students who did not receive training.                                                                                          | Radiology        |
| 58  | (Baghdady, Carnahan, Lam, & Woods, 2014a)                 | specific interventions (diagnostic reasoning, schemas) | Students learning dental radiology by providing a diagnosis first, and subsequently listing features had a higher diagnostic accuracy than students who listed features first, and subsequently provided a diagnosis.                      | Dental radiology |
| 59  | (Baghdady, Pharoah, Regehr, Lam, & Woods, 2009)           | specific interventions (schemas)                       | Students who learned diagnostic oral radiology by studying a basic-science elaboration scored significantly higher on a post-test than students who studied a                                                                              | Dental radiology |

|    |                                                         |                                               |                                                                                                                                                                                               |                  |
|----|---------------------------------------------------------|-----------------------------------------------|-----------------------------------------------------------------------------------------------------------------------------------------------------------------------------------------------|------------------|
|    |                                                         |                                               | structured algorithm or feature list.                                                                                                                                                         |                  |
| 60 | (Baghdady, Carnahan, Lam, & Woods, 2014b)               | specific interventions (Study strategies)     | Students in a test-enhanced condition had a higher test score than students in a study condition.                                                                                             | Dental radiology |
| 61 | (Blissett, Cavalcanti, & Sibbald, 2015)<br>experiment 1 | specific interventions (schemas)              | Students enrolled in a course with an expert-generated ECG interpretation schema had better test scores than students in a traditional course.                                                | ECG              |
| 62 | (Blissett et al., 2015)<br>experiment 2                 | specific interventions (schemas)              | Students studying an expert-generated schema learned ECG interpretation better than students who studied learner-generated schemas.                                                           | ECG              |
| 63 | (Dong et al., 2015)                                     | specific interventions (schemas)              | Students studying ECG interpretation by making concept maps had significantly higher test scores than students taught a traditional teaching format.                                          | ECG              |
| 64 | (Eva, Hatala, LeBlanc, & Brooks, 2007)                  | specific interventions (diagnostic reasoning) | Students scored significantly higher on ECG interpretation when instructed to combine non-analytical reasoning and analytical reasoning as compared to a group without reasoning instruction. | ECG              |
| 65 | (Garg, Haley, & Hatem, 2010)                            | specific interventions (schemas)              | Students who learned dermatology through studying 3D prosthetic mimics of lesions had significantly higher test scores than students who studied 2D images.                                   | Dermatology      |
| 66 | (Hatala, Brooks, & Norman, 2003)                        | specific interventions (schemas)              | Medical students enrolled in a mixed practice course scored significantly higher than students enrolled in a blocked practice course.                                                         | ECG              |
| 67 | (Hecht, Adams, Cunningham, Lane, & Howell,              | specific interventions (other)                | After the introduction of clickers during radiology lectures, medical students were significantly more                                                                                        | Radiology        |

|    |                                                           |                                               |                                                                                                                                                                                                                                                                |             |
|----|-----------------------------------------------------------|-----------------------------------------------|----------------------------------------------------------------------------------------------------------------------------------------------------------------------------------------------------------------------------------------------------------------|-------------|
|    | 2013)                                                     |                                               | positive towards lectures but exam scores did not significantly differ.                                                                                                                                                                                        |             |
| 68 | (Kaliyadan, Amri, Dhufiri, Amin, & Khan, 2012)            | specific interventions (other)                | Students enrolled in a tutorless problem-based learning course did not have significantly different test scores from students enrolled in traditional problem-based learning.                                                                                  | Dermatology |
| 69 | (Kok, de Bruin, Robben, & van Merrienboer, 2013)          | specific interventions (schemas)              | Medical students who were enrolled in comparison learning training with normal images identified significantly more focal diseases on the post-test than students who compared with the same diseases.                                                         | Radiology   |
| 70 | (Kok, de Bruin, Leppink, van Merrienboer, & Robben, 2015) | specific interventions (schemas)              | Medical students enrolled in comparison learning with comparisons of different-diseases and comparisons of same-diseases were most efficient in learning radiology compared to students enrolled in other types of comparison learning or a control condition. | Radiology   |
| 71 | (Kok et al., 2016)                                        | specific interventions (diagnostic reasoning) | Medical students enrolled in systematic-viewing training did not find significantly more abnormalities on the post-test than students enrolled in full-coverage training or non-systematic viewing training.                                                   | Radiology   |
| 72 | (H. Lee et al., 2010)                                     | specific interventions (schemas)              | Significantly more veterinary students could deduce pathophysiological principles underlying radiological changes after education with 3D CT volume rendering models than students who received conventional x-ray education.                                  | Radiology   |
| 73 | (Li et al., 2013)                                         | specific interventions (other)                | Medical students enrolled in one of three problem-based courses (real-patient cases, digital cases or paper                                                                                                                                                    | Dermatology |

|    |                                             |                                  |                                                                                                                                                                                                                                                                                      |           |
|----|---------------------------------------------|----------------------------------|--------------------------------------------------------------------------------------------------------------------------------------------------------------------------------------------------------------------------------------------------------------------------------------|-----------|
|    |                                             |                                  | cases) on dermatology had better results than students in a lecture-based course. Overall results were highest for the group with real-patient cases.                                                                                                                                |           |
| 74 | (Marsch, Espiritu, Groth, & Hutchens, 2014) | specific interventions (other)   | Medical students enrolled in a pathology training in which abnormalities were annotated scored significantly higher on the post-test than students enrolled in a pathology training in which abnormalities were not annotated.                                                       | Pathology |
| 75 | (Pusic et al., 2012)                        | specific interventions (schemas) | Residents enrolled in a training with a high proportion of abnormal images identified significantly more abnormalities on a post-test, while residents enrolled in a training with a low proportion of abnormal images identified significantly more normal images on the post-test. | Radiology |
| 76 | (Pusic, LeBlanc, & Miller, 2007)            | specific interventions (other)   | Medical students enrolled in a training with a fixed order lay-out did not have significantly different test scores from students enrolled in a training with a branched order lay-out.                                                                                              | Radiology |
| 77 | (Rubinstein, Dhoble, & Ferenchick, 2009)    | specific interventions (other)   | Medical students enrolled in a puzzle-based ECG course had significantly higher post-test than pre-test scores, but scores were not significantly different from post-test scores of students enrolled in a traditional course.                                                      | ECG       |
| 78 | (Schultz & Brackbill, 2009)                 | specific interventions (other)   | Medical students enrolled in a dance-based ECG course had significantly higher post-test than pre-test scores, but the scores were not significantly different from post-test scores of students enrolled in a traditional course.                                                   | ECG       |

## Running Title

|    |                                                     |                                               |                                                                                                                                                                                              |           |
|----|-----------------------------------------------------|-----------------------------------------------|----------------------------------------------------------------------------------------------------------------------------------------------------------------------------------------------|-----------|
| 79 | (Shah, Sibbald, Jaffer, Probyn, & Cavalcanti, 2016) | specific interventions (study strategies)     | Medical students enrolled in a blocked-practice radiology course did not have significantly different test scores compared to medical students enrolled in a mixed-practice course.          | Radiology |
| 80 | (Varvaroussis et al., 2014)                         | specific interventions (diagnostic reasoning) | Nursing students enrolled in a systematic-viewing course on ECG interpretation did not have significantly higher post-test scores than students enrolled in a non-systematic viewing course. | ECG       |
| 81 | (van den Berge et al., 2013)                        | specific interventions (schemas)              | Participants who studied ECG worked examples had higher post-test scores than participants who had to describe the ECGs themselves.                                                          | ECG       |
